# Supplementary material for: Sulfur encapsulated in porous hollow CNTs@CNFs for high-performance lithium–sulfur batteries
Source: Royal Society of Chemistry journal article supplement (doi:10.1039/c4ta01823k), 2014-01-01
Supplement: c4ta01823k1.pdf [file c4ta01823k1.pdf]

# Sulfur Encapsulated in Porous Hollow CNTs@CNFs for High-Performance Lithium-Sulfur Batteries

Yuming Chen,<sup>§†‡</sup> Xiaoyan Li,<sup>§‡</sup> Kyusung Park,<sup>†</sup> Jianhe Hong,<sup>†</sup> Jie Song,<sup>†</sup> Limin Zhou,<sup>\*§</sup> Yiu-Wing Mai,<sup>§,||</sup> Haitao Huang,<sup>†</sup> and John B. Goodenough<sup>\*†</sup>

<sup>§</sup>Department of Mechanical Engineering and <sup>†</sup>Department of Applied Physics, The Hong Kong Polytechnic University, Hong Kong, China.

<sup>||</sup>Centre for Advanced Materials Technology (CAMT), School of Aerospace, Mechanical and Mechatronics Engineering J07, The University of Sydney, NSW 2006, Australia.

<sup>†</sup>Texas Materials Institute and Materials Science and Engineering Program, The University of Texas at Austin, Austin, Texas 78712, United State.

\*E-mail: mmlmzhou@polyu.edu.hk; jgoodenough@mail.utexas.edu

<sup>‡</sup>These authors contributed equally.

## Experimental:

### Materials

Polyacrylonitrile (PAN, Mw=150 000, Aldrich), polymethylmethacrylate (PMMA, Tokyo Chemical Industry Co., Ltd), nickel acetate (Ni(Ac)<sub>2</sub>·4H<sub>2</sub>O, Advtechind), dimethylformamide (DMF, Aldrich).

### Encapsulation of sulfur in porous hollow CNTs@CNFs

First, PAN/PMMA/Ni(Ac)<sub>2</sub> composite nanofibers were prepared by coaxial electrospinning, where the inner and outer solution was PMMA solution (0.5 g) in DMF (10 mL) and a mixture of Ni(Ac)<sub>2</sub>·4H<sub>2</sub>O (1 g) and PAN (1 g) in DMF (20 mL), respectively. The tip-collector distance, flow rate for the coaxial solutions, and high voltage were fixed at 20 cm, 0.03 mm min<sup>-1</sup>, and 21 kV, respectively (KATO Tech

Co., Ltd). PMMA could be distributed in the PAN matrix during the electrospinning process because of the use of the same DMF; thus PAN/Ni(Ac)<sub>2</sub>/PMMA composite nanofibers were prepared. Second, the prepared nanofibers were pyrolyzed at 700 °C in H<sub>2</sub>(5 vol %)/N<sub>2</sub>(95 vol %) for 6 h and then heated in vacuum for 6 h to produce CNTs@CNFs@Ni. A mixture of CNTs@CNFs@Ni and KOH (CNTs@CNFs@Ni:KOH=1/4, weight ratio) was heated at 750 °C for 1 h in a tube furnace under a nitrogen atmosphere. The resultant mixture was further treated with HNO<sub>3</sub> to remove the Ni particles to achieve porous hollow CNTs@CNFs. Third, the porous hollow CNTs@CNFs (60 mg) and sulfur (160 mg) were mixed together and treated in quartz tubes that were sealed under vacuum at 400 °C for 24 h to facilitate sulfur diffusion into the resulting carbon matrix. Finally, the composite materials were treated at 200 °C to vaporize the sulfur on the surface of the porous hollow CNTs@CNFs, denoted as CNTs@CNFs-S.

### **Characterization**

The obtained materials were characterized by X-ray diffraction (XRD, Philips, X'Pert Pro MPD), transmission electron microscopy (TEM), high-resolution TEM (HRTEM, JEOL 2010F, Japan), energy-dispersive X-ray spectroscopy (EDS, Oxford), electron energy loss spectroscopy (EELS, Gatan, Enfina), and X-ray photoelectron spectroscopy (XPS, Kratos Axis 165, Manchester), respectively. The N<sub>2</sub> adsorption and desorption isotherms at 77 K were determined (Quantachrome, Autosorb-iQ) and the pore-size distribution was calculated by the Barrett-Joyner-Halenda (BJH) method. Thermogravimetric analysis (TGA, Perkin-Elmer) was performed in a flow of N<sub>2</sub> with a heating rate of 5 °C min<sup>-1</sup>.

### **Electrochemical testing**

The cathode electrode was fabricated by mixing the prepared materials (80 wt.%), carbon black (10 wt.%) and poly(vinyl difluoride) (10 wt.%, PVDF) binder. Carbon-black (CB)/sulfur composites were also prepared for comparison. Two-electrode coin cells with activate materials as cathode and lithium foil as anode were assembled for electrochemical testing. The electrolyte was a mixture of 1.5 M

LiCF<sub>3</sub>SO<sub>3</sub> and 0.1 M LiNO<sub>3</sub> salts into a 1:1 vol/vol mixture of 1,2-dimethoxyethane and 1,3-dioxolane. Charge and discharge were conducted by using an Arbin automatic battery cyler at various current densities within a voltage range of 1.5-3 V. The cyclic voltammetry (CV) measurement was performed on a Solartron SI 1287 electrochemical workstation at a scan rate of 0.1 mV s<sup>-1</sup>. The specific capacity was calculated based on the mass of sulfur.

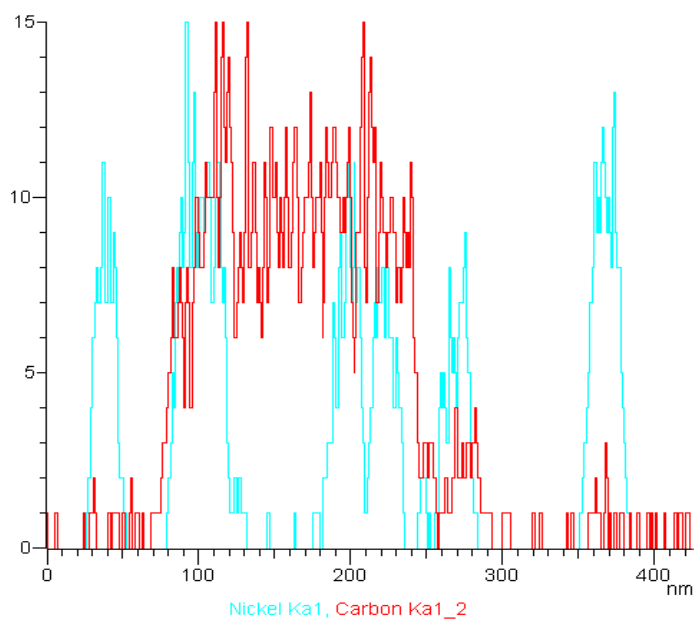

**Figure S1.** EDS line-scan profiles of the CNT@CNF@Ni.

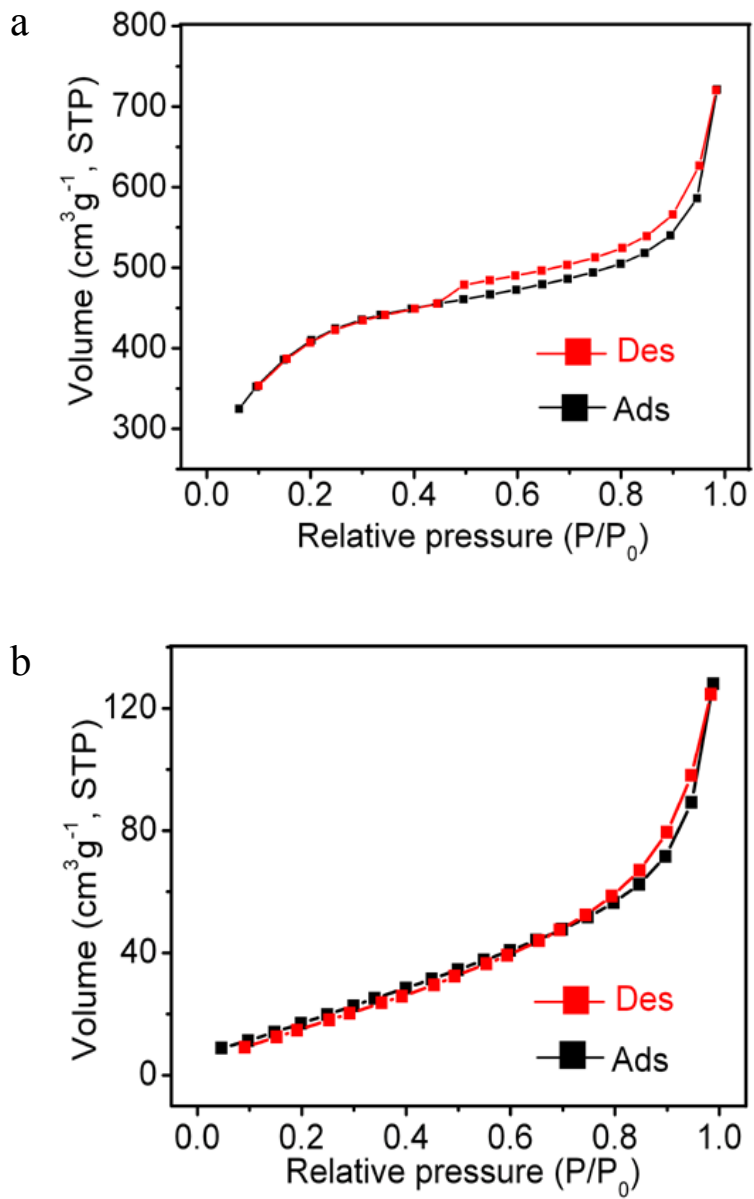

**Figure S2.** Nitrogen adsorption-desorption isotherms of the porous hollow CNTs@CNFs and CNTs@CNFs-S.

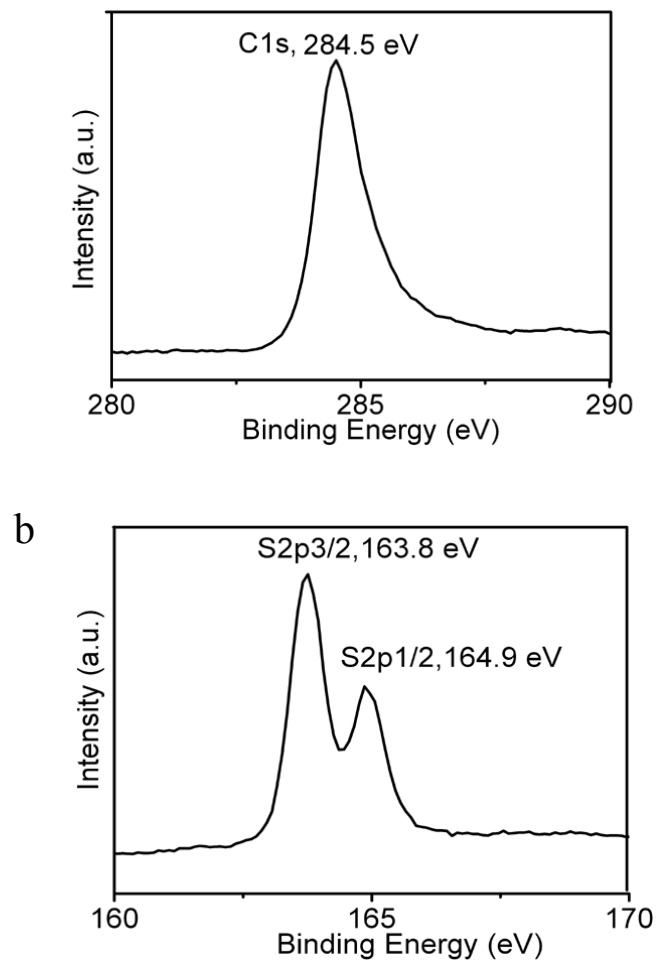

**Figure S3.** XPS spectra of porous hollow CNTs@CNFs-S. (a) C1s spectra and (b) S2p spectra.

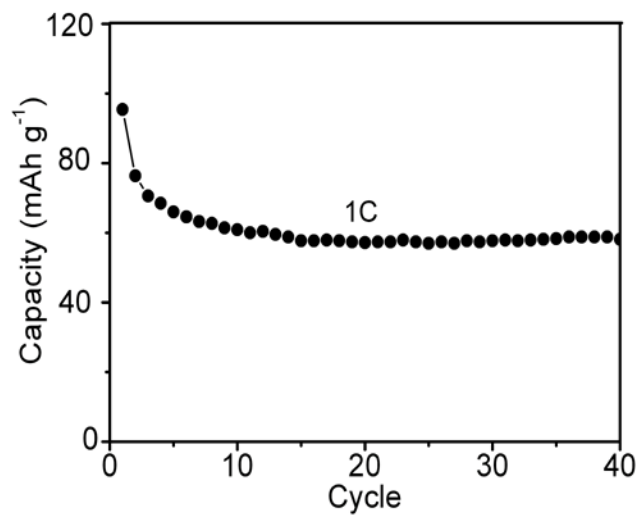

**Figure S4.** Cycling stability of CB-S electrode at 1 C
